# Supplementary material for: Multimorbidity patterns and associated factors in older Chinese: results from the China health and retirement longitudinal study
Source: PubMed Central journal article supplement (PMC9158229; doi:10.1186/s12877-022-03154-9), 2022-06-01

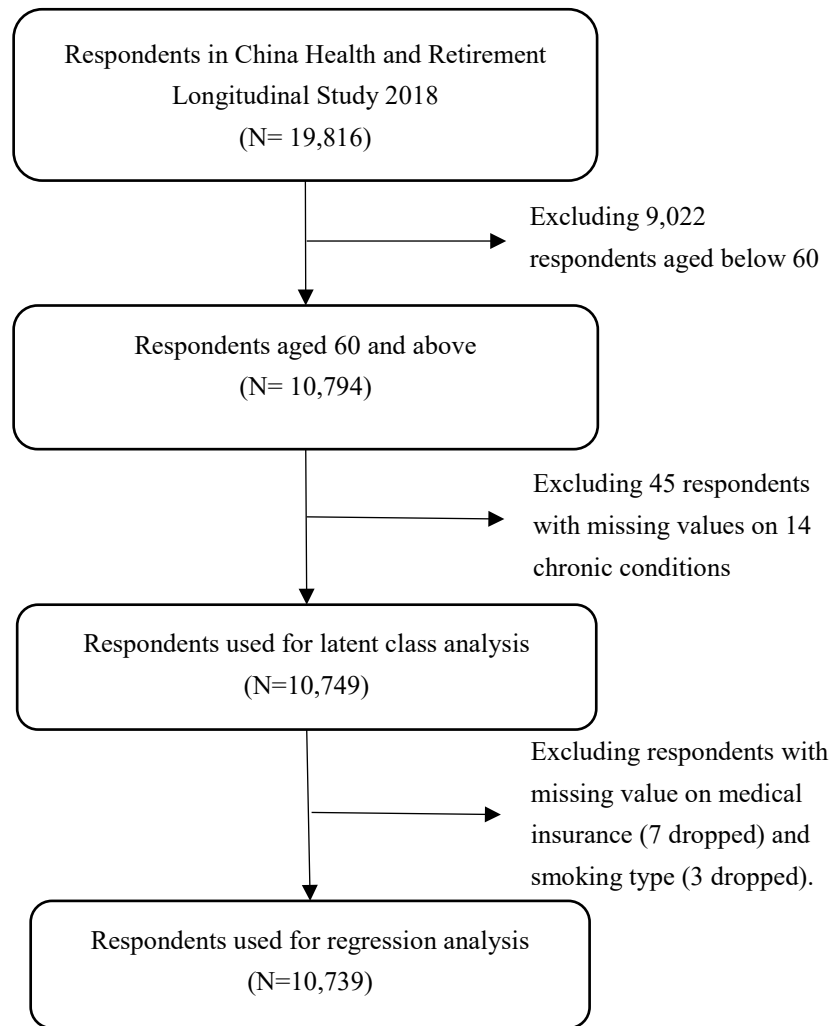

Supplement: 12877_2022_3154_MOESM1_ESM.pdf [file 12877_2022_3154_MOESM1_ESM.pdf]
